# Supplementary material for: Effects of prescribed CMIP6 ozone on simulating the SouthernHemisphere atmospheric circulation response to ozone depletion
Source: Copernicus journal article supplement (doi:10.5194/acp-2020-705), 2020-10-05
Supplement: Supplementary file 1 [file acp-2020-705-supplement.pdf]

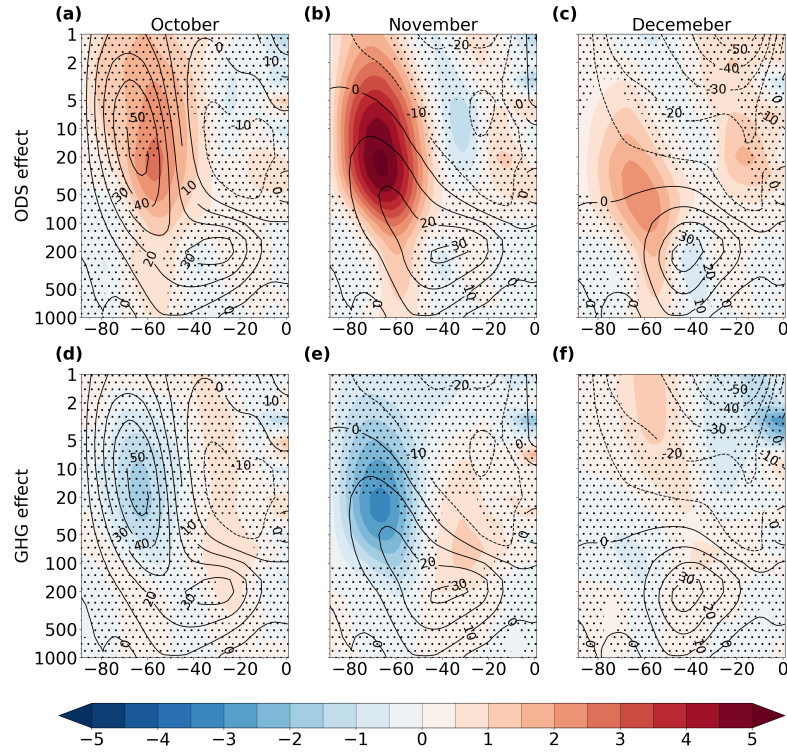

**Figure S1.** Latitude-height zonal wind difference between REF and NoODS (a, b and c) and between REF and NoGHG (d, e and f) for October (a and d), November (b and e) and December (c and f) in  $\text{m s}^{-1}$  (color shading). Stippling masks values that are not significant at the 95% confidence interval. The overlaying contours mark the 1958-2013 climatology of each respective month from REF.

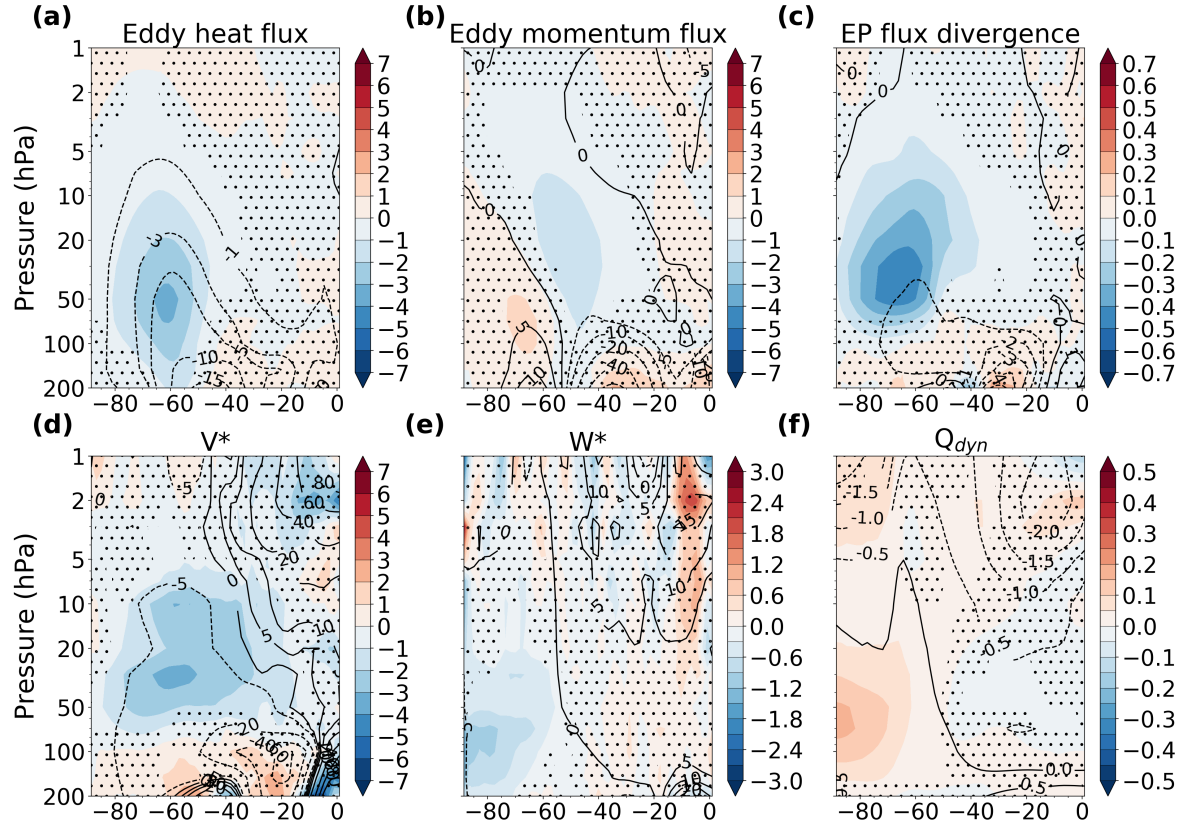

**Figure S2.** Latitude-height December difference between REF and NoODS in the eddy heat flux (a, in  $\text{K m s}^{-1}$ ), the eddy momentum flux (b, in  $\text{m}^2 \text{s}^{-2}$ ), the divergence of the EP flux (c, in  $\text{m s}^{-1} \text{day}^{-1}$ ), the meridional residual velocity (d, in  $10^{-2} \text{m s}^{-1}$ ), the vertical residual velocity (e, in  $10^{-4} \text{m s}^{-1}$ ) and in the dynamical heating rate (f, in  $\text{K day}^{-1}$ ) for the period 1958-2013 (color shading). Contours in each panel show the corresponding climatology from REF. Stippling masks values that are not significant at the 95% confidence interval.

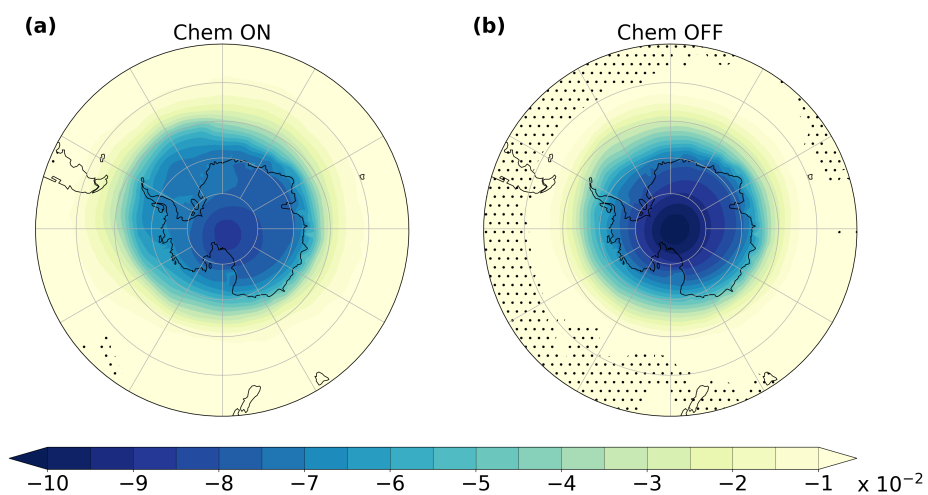

**Figure S3.** Polar stereographic maps of the October 70 hPa trends in SW heating rate for Chem ON (a) and Chem OFF (b) in  $\text{K day}^{-1} \text{dec}^{-1}$  for the period 1958-2013. Stippling masks regions where the trends are not significant at the 95% confidence level. Note that the scale is multiplied by  $10^{-2}$ .
